# Supplementary material for: Effects of Multidisciplinary Biopsychosocial Rehabilitation on Short-Term Pain and Disability in Chronic Low Back Pain: A Systematic Review with Network Meta-Analysis
Source: MDPI journal article supplement (doi:10.3390/jcm12237489), 2023-12-04

**Supplement document S1. Search strategy**

**PubMed – articles retrieved up to 4<sup>th</sup> of March, 2022.**

| #  | Search term                                      | Search Details as generated by Pubmed                                                                                                                                                                                                                                                                                                                                                                                                                                                                                                                                                                                                                                                                                                                              | Items        |
|----|--------------------------------------------------|--------------------------------------------------------------------------------------------------------------------------------------------------------------------------------------------------------------------------------------------------------------------------------------------------------------------------------------------------------------------------------------------------------------------------------------------------------------------------------------------------------------------------------------------------------------------------------------------------------------------------------------------------------------------------------------------------------------------------------------------------------------------|--------------|
| 1  | low back pain                                    | "low back pain"[MeSH Terms] OR ("low"[All Fields] AND "back"[All Fields] AND "pain"[All Fields]) OR "low back pain"[All Fields]                                                                                                                                                                                                                                                                                                                                                                                                                                                                                                                                                                                                                                    | 12565        |
| 2  | exercise therapy                                 | "exercise therapy"[MeSH Terms] OR ("exercise"[All Fields] AND "therapy"[All Fields]) OR "exercise therapy"[All Fields]                                                                                                                                                                                                                                                                                                                                                                                                                                                                                                                                                                                                                                             | 88380        |
| 3  | cognitive behavior therapy [MeSH Terms]          | "cognitive behavioral therapy"[MeSH Terms]                                                                                                                                                                                                                                                                                                                                                                                                                                                                                                                                                                                                                                                                                                                         | 14463        |
| 4  | multidisciplinary biopsychosocial rehabilitation | ("interdisciplinary studies"[MeSH Terms] OR ("interdisciplinary"[All Fields] AND "studies"[All Fields]) OR "interdisciplinary studies"[All Fields] OR "multidisciplinary"[All Fields]) AND ("biopsychosocial"[All Fields] OR "biopsychosocially"[All Fields]) AND ("rehabilitant"[All Fields] OR "rehabilitants"[All Fields] OR "rehabilitate"[All Fields] OR "rehabilitated"[All Fields] OR "rehabilitates"[All Fields] OR "rehabilitating"[All Fields] OR "rehabilitation"[MeSH Terms] OR "rehabilitation"[All Fields] OR "rehabilitations"[All Fields] OR "rehabilitative"[All Fields] OR "rehabilitation"[MeSH Subheading] OR "rehabilitation s"[All Fields] OR "rehabilitational"[All Fields] OR "rehabilitator"[All Fields] OR "rehabilitators"[All Fields]) | 913          |
| 5  | Psychosocial Support Systems [MeSH Terms]        | "psychosocial support systems"[MeSH Terms]                                                                                                                                                                                                                                                                                                                                                                                                                                                                                                                                                                                                                                                                                                                         | 278          |
| 6  | Occupational Therapy[MeSH Terms]                 | "occupational therapy"[MeSH Terms]                                                                                                                                                                                                                                                                                                                                                                                                                                                                                                                                                                                                                                                                                                                                 | 34439        |
| 7  | Patient Education[MeSH Terms]                    | "patient education as topic"[MeSH Terms]                                                                                                                                                                                                                                                                                                                                                                                                                                                                                                                                                                                                                                                                                                                           | 143191       |
| 8  | Biofeedback[MeSH Terms]                          | "biofeedback, psychology"[MeSH Terms])                                                                                                                                                                                                                                                                                                                                                                                                                                                                                                                                                                                                                                                                                                                             | 355          |
| 9  | #2 OR #3 OR #4 OR #5 OR #6 OR #7 OR #8           | /                                                                                                                                                                                                                                                                                                                                                                                                                                                                                                                                                                                                                                                                                                                                                                  | 48706        |
| 10 | #1 OR #9                                         | /                                                                                                                                                                                                                                                                                                                                                                                                                                                                                                                                                                                                                                                                                                                                                                  | <b>1210*</b> |

**\* Filters: Controlled Clinical Trial, Pragmatic Clinical Trial, Randomized Controlled Trial**

Ovid – articles retrieved up to 4<sup>th</sup> of March 2022.

(Journals@Ovid Full Text & Cochrane Central Register of Controlled Trials, CINAHAL, PsycINFO)

| #  | Search term                                                                                                                                                  | No. of papers |
|----|--------------------------------------------------------------------------------------------------------------------------------------------------------------|---------------|
| 1  | randomized controlled trial.pt.                                                                                                                              | 545949        |
| 2  | controlled clinical trial.pt.                                                                                                                                | 92954         |
| 3  | random*.ti,ab.                                                                                                                                               | 1516760       |
| 4  | or/1-3                                                                                                                                                       | 1725090       |
| 5  | exp back pain/ or exp low back pain/                                                                                                                         | 5465          |
| 6  | chronic low back pain.mp.                                                                                                                                    | 15053         |
| 7  | dorsalgia.mp.                                                                                                                                                | 224           |
| 8  | lumbago.mp.                                                                                                                                                  | 1544          |
| 9  | or/5-8                                                                                                                                                       | 20228         |
| 10 | exp exercise therapy/ or exp motion therapy, continuous passive/ or exp muscle stretching exercises/ or exp plyometric exercise/ or exp resistance training/ | 15499         |
| 11 | exercise thera\$.mp.                                                                                                                                         | 22105         |
| 12 | 10 or 11                                                                                                                                                     | 26266         |
| 13 | Multidisciplinary Biopsychosocial Rehabilitation.mp. [mp=ti, ab, tx, ct, ot, sh, hw, kw]                                                                     | 107           |
| 14 | exp social support/                                                                                                                                          | 3466          |
| 15 | exp occupational therapy/                                                                                                                                    | 813           |
| 16 | exp Patient Education/                                                                                                                                       | 9173          |
| 17 | exp Behavior Therapy/                                                                                                                                        | 10077         |
| 18 | exp biofeedback, psychology/                                                                                                                                 | 1494          |
| 19 | or/13-18                                                                                                                                                     | 22453         |
| 20 | 4 and 9                                                                                                                                                      | 8402          |
| 21 | 12 or 19                                                                                                                                                     | 47513         |
| 22 | 20 and 21                                                                                                                                                    | <b>1354</b>   |

Ovid – articles retrieved up to 4<sup>th</sup> of March 2022.

(Journals@Ovid Full Text & Cochrane Central Register of Controlled Trials, EMBASE)

| #  | Search term                                                                                                                                                  | No. of papers |
|----|--------------------------------------------------------------------------------------------------------------------------------------------------------------|---------------|
| 1  | randomized controlled trial.pt.                                                                                                                              | 0             |
| 2  | controlled clinical trial.pt.                                                                                                                                | 0             |
| 3  | random*.ti,ab.                                                                                                                                               | 1482762       |
| 4  | or/1-3                                                                                                                                                       | 1482762       |
| 5  | exp back pain/ or exp low back pain/                                                                                                                         | 6530          |
| 6  | chronic low back pain.mp.                                                                                                                                    | 15050         |
| 7  | dorsalgia.mp.                                                                                                                                                | 237           |
| 8  | lumbago.mp.                                                                                                                                                  | 1601          |
| 9  | or/5-8                                                                                                                                                       | 20984         |
| 10 | exp exercise therapy/ or exp motion therapy, continuous passive/ or exp muscle stretching exercises/ or exp plyometric exercise/ or exp resistance training/ | 17648         |
| 11 | exercise thera\$.mp.                                                                                                                                         | 23263         |
| 12 | 10 or 11                                                                                                                                                     | 28475         |
| 13 | Multidisciplinary Biopsychosocial Rehabilitation.mp. [mp=ti, ab, tx, ct, ot, sh, hw, kw]                                                                     | 107           |
| 14 | exp social support/                                                                                                                                          | 4142          |
| 15 | exp occupational therapy/                                                                                                                                    | 947           |
| 16 | exp Patient Education/                                                                                                                                       | 9962          |
| 17 | exp Behavior Therapy/                                                                                                                                        | 23040         |
| 18 | exp biofeedback, psychology/                                                                                                                                 | 1808          |
| 19 | or/13-18                                                                                                                                                     | 5188          |
| 20 | 4 and 9                                                                                                                                                      | 7840          |
| 21 | 12 or 19                                                                                                                                                     | 33447         |
| 22 | 20 and 21                                                                                                                                                    | <b>1860</b>   |

## PEDro

Therapy: fitness training

Problem: pain

Body part: Lumbar spine, sacroiliac joint or pelvis

Topic: chronic pain

Method: clinical trial

Match all search terms (AND)

**= 195 (04.03.2022.)**

## **Supplement document S2. Risk of Bias 2 Overall category explained**

The overall risk of bias in our network meta-analysis was determined by an algorithm that considered the importance and level of bias across different domains, namely D1, D3, and D4. The risk of bias was classified into three categories: Low Bias (LB), Some Concerns (SC), and High Bias (HB). Domains D1, D3, and D4 were classified as most having the most impact on risk of bias in eligible studies. In the methodology of our analysis, we identified D1, D3, and D4 as the most impactful domains for the bias assessment due to their inherent attributes in study design and data management. We recognized D2 (Bias due to deviations from intended interventions) and D5 (Bias in selection of the reported result) as important but slightly less influential in determining the overall bias for several reasons. For D2, it's critical to acknowledge the complex nature of many interventions in medical research, especially those that span a long duration. In these contexts, minor deviations from the intended intervention protocol are somewhat inevitable. Further, blinding of caregivers is often impracticable due to the nature of the interventions. These factors decrease the relative weight of D2 in bias determination as deviations may occur without significantly compromising the reliability of the study results.

For D5, the assessment of bias in the selection of reported results can be challenging due to the lack of publicly available pre-study protocols, particularly for older studies. This limitation often restricts our ability to definitively determine if the re-reported outcomes were selected based on the results.

Despite the differential weighting of these domains, it is essential to stress that all were considered in our overall risk of bias assessment, however D1, D3, and D4 generally tend to carry more weight due to their more direct influence on study outcomes and results.

1. The studies were classified as having "Low Bias" if all domains were assessed as LB or if domains D2 and/or D5 were assessed as having some concerns, but all other domains were LB.
2. The classification "Some Concerns" was assigned if either D1, D3, or D4 were assessed as having some concerns or if all other domains were LB while D2 and/or D5 were rated as high bias.
3. A classification of "High Bias" was assigned under the following conditions: if either D1, D3, or D4 were rated as high bias, if D1, D3, or D4 were assessed as having some concerns and D2 and D5 were high bias, or under any other combination not fitting the previous categories.

Figure S1. PRISMA flow diagram

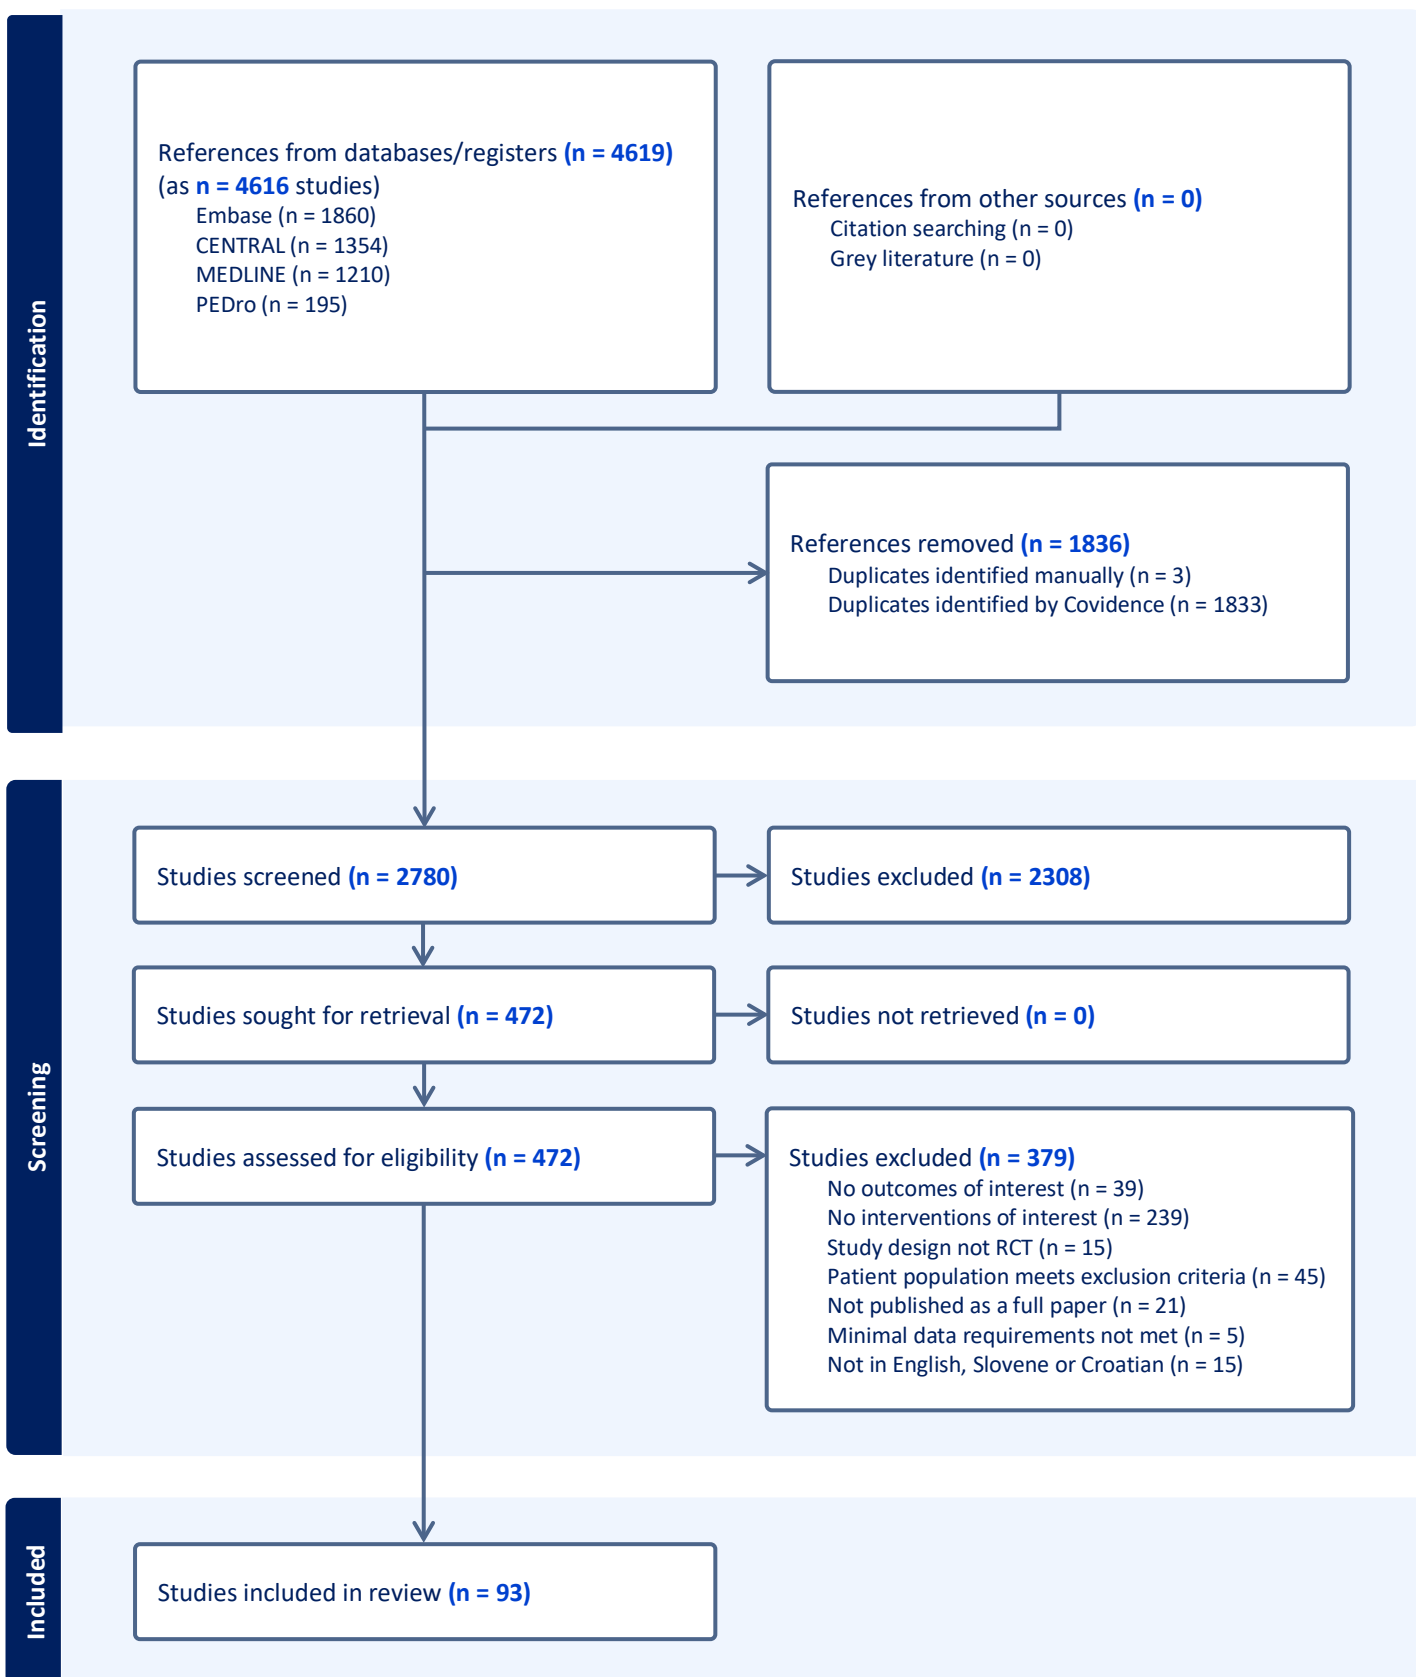

**Table S1.** Characteristics of included studies (k = 93)

| Author, year       | Pain outcomes | Disability outcomes | Comparison      | # of participants | Duration of follow-up | Setting               |
|--------------------|---------------|---------------------|-----------------|-------------------|-----------------------|-----------------------|
| Ahmed 2021         | VAS (0-10)    | ODI                 | ET vs MBR vs UC | 125               | 12 weeks              | Clinical inpatient    |
| Almhdawi 2020      | VAS (0-10)    | ODI                 | ET vs MI        | 41                | 6 weeks               | Outpatient            |
| Alvani 2021        | VAS (0-10)    | ODI                 | ET vs MI        | 30                | 8 weeks               | Clinical inpatient    |
| Barone Gibbs 2018  | VAS (0-10)    | ODI                 | MBR vs MI       | 27                | 4 weeks               | Outpatient            |
| Bodes Pardo 2018   | VAS (0-10)    | RMDQ                | ET vs MBR       | 56                | 4 weeks               | Clinical inpatient    |
| Borys 2015         | VAS (0-10)    | //                  | MBR vs MI       | 132               | 3 weeks               | Clinical inpatient    |
| Costa 2009         | VAS (0-10)    | RMDQ                | ET vs UC        | 154               | 8 weeks               | Clinical inpatient    |
| Costantino 2014    | //            | RMDQ                | ET vs MBR       | 54                | 12 weeks              | Clinical inpatient    |
| Cruz-Diaz 2018     | VAS (0-10)    | RMDQ                | ET vs MI        | 61                | 16 weeks              | University laboratory |
| Cuesta-Vargas 2012 | VAS (0-100)   | RMDQ                | ET vs UC        | 58                | 15 weeks              | Clinical inpatient    |
| Darnall 2021       | VAS (0-10)    | //                  | MBR vs MI       | 218               | 2 weeks               | Academic              |
| Devasahayam 2014   | VAS (0-10)    | RMDQ                | MBR vs UC       | 15                | 4 weeks               | Clinical inpatient    |
| Donzelli 2006      | VAS (0-10)    | ODI                 | ET vs MBR       | 43                | 4 weeks               | Outpatient            |
| Dufour 2010        | VAS (0-100)   | RMDQ                | ET vs MBR       | 272               | 12 weeks              | Clinical inpatient    |
| Durmus 2014        | VAS (0-10)    | ODI                 | ET vs MBR       | 121               | 12 weeks              | Clinical inpatient    |
| Frost 1995         | VAS (0-100)   | ODI                 | ET vs MI        | 71                | 4 weeks               | Clinical inpatient    |
| Garcia 2018        | VAS (0-10)    | RMDQ                | MI vs MBR       | 147               | 5 weeks               | Clinical inpatient    |
| Gardner 2019       | VAS (0-10)    | QBPDS               | ET vs MBR       | 75                | 8 weeks               | Clinical inpatient    |
| Godfrey 2020       | VAS (0-10)    | RMDQ                | MBR vs UC       | 217               | 12 weeks              | Clinical inpatient    |
| Goldby 2006        | VAS (0-100)   | ODI                 | MI vs MBR       | 124               | 10 weeks              | Clinical inpatient    |
| Hall 2011          | VAS (0-10)    | RMDQ                | ET vs MI        | 160               | 10 weeks              | Clinical inpatient    |
| Haufe 2017         | VAS (0-10)    | ODI                 | ET vs vs MI     | 55                | 20 weeks              | Clinical inpatient    |
| Highland 2018      | VAS (0-10)    | RMDQ                | ET vs vs MI     | 68                | 8 weeks               | Military hospital     |
| Jaromi 2012        | VAS (0-100)   | //                  | UC vs MBR       | 111               | 6 weeks               | University clinic     |
| Jaromi 2018        | VAS (0-100)   | //                  | MBR vs MI       | 137               | 12 weeks              | Academic              |
| Jensen 2012        | VAS (0-10)    | RMDQ                | ET vs MI        | 100               | 10 weeks              | Clinical inpatient    |
| Kääpä 2006         | VAS (0-10)    | ODI                 | ET vs MBR       | 120               | 8 weeks               | Clinical inpatient    |

| Author, year      | Pain outcomes | Disability outcomes | Comparison      | # of participants | Duration of follow-up | Setting            |
|-------------------|---------------|---------------------|-----------------|-------------------|-----------------------|--------------------|
| Kader 2012        | MGPQ (0-78)   | ODI                 | ET vs MBR       | 42                | 10 weeks              | Clinical inpatient |
| Kankaanpää 1999   | VAS (0-100)   | PDI                 | ET vs MI        | 54                | 12 weeks              | Clinical inpatient |
| Khan 2014         | VAS (0-10)    | RMDQ                | UC vs MBR       | 54                | 12 weeks              | Clinical inpatient |
| Khodadad 2020     | VAS (0-10)    | //                  | ET vs UC vs MBR | 52                | 8 weeks               | Clinical inpatient |
| Kim 2020          | VAS (0-10)    | ODI                 | ET vs MBR       | 48                | 8 weeks               | Clinical inpatient |
| Kim 2022          | VAS (0-10)    | RMDQ                | ET vs MBR       | 35                | 8 weeks               | Clinical inpatient |
| Kofotolis 2006    | VAS (0-10)    | ODI                 | ET vs UC        | 86                | 4 weeks               | Clinical inpatient |
| Koldas Dogan 2008 | VAS (0-100)   | RMDQ                | ET vs UC        | 55                | 6 weeks               | Outpatient         |
| Kumar 2009 A      | VAS (0-10)    | //                  | ET vs UC        | 102               | 4 weeks               | Clinical inpatient |
| Kumar 2009 B      | VAS (0-10)    | //                  | ET vs UC        | 30                | 4 weeks               | Athletic club      |
| Kuvacic 2018      | VAS (0-10)    | ODI                 | ET vs MI        | 30                | 8 weeks               | Clinical inpatient |
| Linden 2014       | VAS (0-10)    | //                  | MBR vs UC       | 103               | 3 weeks               | Clinical inpatient |
| Masharawi 2013    | VAS (0-10)    | RMDQ                | ET vs MI        | 40                | 4 weeks               | Clinical inpatient |
| Mazloun 2018      | VAS (0-10)    | ODI                 | ET vs MI        | 56                | 4 weeks               | Clinical inpatient |
| McCaskey 2018     | VAS (0-100)   | ODI                 | ET vs UC        | 22                | 5 weeks               | Clinical inpatient |
| Michalsen 2021    | VAS (0-100)   | RMDQ                | ET vs UC        | 182               | 8 weeks               | Clinical inpatient |
| Miyamoto 2013     | VAS (0-10)    | RMDQ                | ET vs MI        | 86                | 6 weeks               | Clinical inpatient |
| Monticone 2013    | VAS (0-10)    | //                  | ET vs MBR       | 90                | 5 weeks               | Clinical inpatient |
| Monticone 2014    | VAS (0-10)    | ODI                 | UC vs MBR       | 20                | 8 weeks               | Clinical inpatient |
| Monticone 2016    | VAS (0-10)    | ODI                 | UC vs MBR       | 150               | 5 weeks               | Outpatient         |
| Morone 2011       | VAS (0-10)    | ODI                 | MI vs MBR       | 70                | 4 weeks               | Clinical inpatient |
| Morone 2012       | VAS (0-10)    | ODI                 | MBR vs MI       | 50                | 4 weeks               | Clinical inpatient |
| Moseley 2002      | VAS (0-10)    | RMDQ                | MI vs MBR       | 57                | 4 weeks               | University clinic  |
| Nambi 2021        | VAS (0-10)    | //                  | ET vs UC        | 54                | 4 weeks               | Clinical inpatient |
| Narouei 2020      | VAS (0-10)    | ODI                 | ET vs UC        | 34                | 4 weeks               | Clinical inpatient |
| Nassif 2011       | VAS (0-10)    | RMDQ                | MI vs MBR       | 75                | 8 weeks               | Outpatient         |
| Natour 2015       | VAS (0-10)    | RMDQ                | ET vs MI        | 60                | 7 weeks               | Clinical inpatient |
| Nicholas 1991     | PRC (0-5)     | //                  | MBR vs UC       | 59                | 5 weeks               | Clinical inpatient |
| Okafor 2012       | VAS (0-10)    | //                  | ET vs UC        | 30                | 6 weeks               | Clinical inpatient |

| Author, year            | Pain outcomes | Disability outcomes | Comparison      | # of participants | Duration of follow-up | Setting               |
|-------------------------|---------------|---------------------|-----------------|-------------------|-----------------------|-----------------------|
| O'Keeffe 2020           | VAS (0-10)    | ODI                 | MBR vs UC       | 194               | 8 weeks               | Clinical inpatient    |
| Patti 2016              | //            | ODI                 | ET vs MI        | 38                | 14 weeks              | Clinical inpatient    |
| Paungmali 2017          | VAS (0-10)    | //                  | ET vs MI        | 50                | 1 week                | Controlled laboratory |
| Petrozzi 2019           | VAS (0-10)    | RMDQ                | UC vs MBR       | 108               | 6 weeks               | Outpatient            |
| Phattharasupharerk 2019 | VAS (0-100)   | RMDQ                | ET vs MI        | 72                | 6 weeks               | Outpatient            |
| Pires 2015              | VAS (0-100)   | QBPDS               | ET vs MBR       | 62                | 6 weeks               | Clinical inpatient    |
| Polaski 2021            | VAS (0-10)    | RMDQ                | MBR vs MI       | 38                | 4 weeks               | Clinical inpatient    |
| Rabiei 2021             | VAS (0-10)    | RMDQ                | ET vs MBR       | 73                | 8 weeks               | Clinical inpatient    |
| Roche-Leboucher 2011    | VAS (0-10)    | //                  | ET vs MBR       | 132               | 5 weeks               | Clinical inpatient    |
| Rydeard 2006            | VAS (0-100)   | RMDQ                | ET vs Uc        | 39                | 4 weeks               | Clinical inpatient    |
| De Sousa 2009           | VAS (0-10)    | RMDQ                | MBR vs MI       | 52                | 8 weeks               | Outpatient            |
| Santos 2022             | VAS (0-10)    | RMDQ                | ET vs MI        | 43                | 4 weeks               | Clinical inpatient    |
| Saper 2009              | VAS (0-10)    | RMDQ                | ET vs MI        | 30                | 12 weeks              | Clinical inpatient    |
| Saper 2017              | VAS (0-10)    | RMDQ                | ET vs MI        | 320               | 12 weeks              | Clinical inpatient    |
| Schinhan 2016           | VAS (0-10)    | //                  | ET vs MI        | 30                | 8 weeks               | Clinical inpatient    |
| Shamsi 2016             | VAS (0-100)   | ODI                 | ET vs UC        | 43                | 5 weeks               | Clinical inpatient    |
| Shaughnessy 2004        | //            | RMDQ                | ET vs MI        | 41                | 10 weeks              | Clinical inpatient    |
| Sherman 2011            | VAS (0-10)    | RMDQ                | ET vs MI        | 228               | 12 weeks              | Clinical inpatient    |
| Tilbrook 2011           | //            | RMDQ                | ET vs UC        | 299               | 12 weeks              | Clinical inpatient    |
| Torstensen 1998         | VAS (0-100)   | ODI                 | ET vs UC        | 138               | 12 weeks              | Clinical inpatient    |
| Tritilanunt 2001        | VAS (0-10)    | //                  | ET vs MBR       | 68                | 12 weeks              | Outpatient            |
| Turner 1990             | MGPQ (0-78)   | //                  | ET vs MBR vs MI | 96                | 8 weeks               | Clinical inpatient    |
| Valenza 2017            | VAS (0-10)    | RMDQ                | ET vs MI        | 54                | 8 weeks               | Clinical inpatient    |
| Van Der Roer 2008       | VAS (0-10)    | RMDQ                | UC vs MBR       | 114               | 6 weeks               | Clinical inpatient    |
| Van Erp 2021            | VAS (0-10)    | QBPDS               | UC vs MBR       | 25                | 12 sessions           | Clinical inpatient    |
| Vibe Fersum 2013        | VAS (0-10)    | ODI                 | MBR vs UC       | 94                | 12 weeks              | Outpatient            |
| Vollenbroek-Hutten 2004 | //            | RMDQ                | MI vs MBR       | 151               | 8 weeks               | Outpatient            |
| Walti 2015              | VAS (0-10)    | RMDQ                | UC vs MBR       | 28                | 8 weeks               | Clinical inpatient    |
| Waseem 2019             | //            | ODI                 | ET vs UC        | 108               | 6 weeks               | Clinical inpatient    |



| Author, year  | Pain<br>outcomes | Disability<br>outcomes | Comparison | # of<br>participants | Duration of<br>follow-up | Setting            |
|---------------|------------------|------------------------|------------|----------------------|--------------------------|--------------------|
| Weifen 2013   | VAS (0-100)      | //                     | ET vs MI   | 188                  | 12 weeks                 | Clinical inpatient |
| Williams 2009 | VAS (0-100)      | ODI                    | ET vs MI   | 90                   | 12 weeks                 | Clinical inpatient |
| Williams 2018 | VAS (0-10)       | RMDQ                   | MBR vs MI  | 159                  | 12 weeks                 | Outpatient         |
| Yang 2021     | VAS (0-100)      | RMDQ                   | ET vs UC   | 39                   | 8 weeks                  | Clinical inpatient |
| Zadro 2019    | VAS (0-10)       | RMDQ                   | ET vs UC   | 60                   | 8 weeks                  | Clinical inpatient |
| Zhang 2014    | VAS (0-10)       | ODI                    | UC vs MBR  | 54                   | 12 weeks                 | Clinical inpatient |
| Zheng 2022    | VAS (0-10)       | RMDQ                   | ET vs MBR  | 40                   | 6 weeks                  | Clinical inpatient |
| Zou 2019      | VAS (0-10)       | //                     | ET vs MI   | 43                   | 12 weeks                 | Clinical inpatient |

**Legend:** VAS = visual analogue scale; PRC - Pain Rating Chart; ODI = Oswestry Disability Index; RMDQ = Roland – Morris Disability Questionnaire; QBPDS = Quebec Back Pain Disability Scale; PDI = Pain and Disability Index; DI = Disability Index; HFAQ - Hannover Functional Ability Questionnaire; MGPQ = McGill Pain Questionnaire

**Figure S2.** Risk of Bias 2 visualization (part 1)

|                    | Risk of bias domains |    |    |    |    | Overall |
|--------------------|----------------------|----|----|----|----|---------|
|                    | D1                   | D2 | D3 | D4 | D5 |         |
| Ahmed 2021         |                      |    |    |    |    |         |
| Almhdawi 2020      |                      |    |    |    |    |         |
| Alvani 2021        |                      |    |    |    |    |         |
| Barone Gibbs 2018  |                      |    |    |    |    |         |
| Bodes Pardo 2018   |                      |    |    |    |    |         |
| Borys 2015         |                      |    |    |    |    |         |
| Costa 2009         |                      |    |    |    |    |         |
| Costantino 2014    |                      |    |    |    |    |         |
| Cruz-Diaz 2018     |                      |    |    |    |    |         |
| Cuesta-Vargas 2012 |                      |    |    |    |    |         |
| Darnall 2021       |                      |    |    |    |    |         |
| Devasahayam 2014   |                      |    |    |    |    |         |
| Donzelli 2006      |                      |    |    |    |    |         |
| Dufour 2010        |                      |    |    |    |    |         |
| Durmus 2014        |                      |    |    |    |    |         |
| Frost 1995         |                      |    |    |    |    |         |
| Garcia 2018        |                      |    |    |    |    |         |
| Gardner 2019       |                      |    |    |    |    |         |
| Godfrey 2020       |                      |    |    |    |    |         |
| Goldby 2006        |                      |    |    |    |    |         |

**Figure S3.** Risk of Bias 2 visualization (part 2)

|                   |  |  |  |  |  |  |
|-------------------|--|--|--|--|--|--|
| Hall 2011         |  |  |  |  |  |  |
| Haufe 2017        |  |  |  |  |  |  |
| Highland 2018     |  |  |  |  |  |  |
| Jaromi 2012       |  |  |  |  |  |  |
| Jaromi 2018       |  |  |  |  |  |  |
| Jensen 2012       |  |  |  |  |  |  |
| Kääpä 2006        |  |  |  |  |  |  |
| Kader 2012        |  |  |  |  |  |  |
| Kankaanpää 1999   |  |  |  |  |  |  |
| Khan 2014         |  |  |  |  |  |  |
| Khodadad 2020     |  |  |  |  |  |  |
| Kim 2020          |  |  |  |  |  |  |
| Kim 2022          |  |  |  |  |  |  |
| Kofotolis 2006    |  |  |  |  |  |  |
| Koldas Dogan 2008 |  |  |  |  |  |  |
| Kumar 2009 A      |  |  |  |  |  |  |
| Kumar 2009 B      |  |  |  |  |  |  |
| Kuvacic 2018      |  |  |  |  |  |  |
| Linden 2014       |  |  |  |  |  |  |
| Masharawi 2013    |  |  |  |  |  |  |
| Mazloun 2018      |  |  |  |  |  |  |
| McCaskey 2018     |  |  |  |  |  |  |
| Michalsen 2021    |  |  |  |  |  |  |
| Miyamoto 2013     |  |  |  |  |  |  |
| Monticone 2013    |  |  |  |  |  |  |

**Figure S4.** Risk of Bias 2 visualization (part 3)

|                         |  |  |  |  |  |  |
|-------------------------|--|--|--|--|--|--|
| Morone 2012             |  |  |  |  |  |  |
| Moseley 2002            |  |  |  |  |  |  |
| Nambi 2021              |  |  |  |  |  |  |
| Narouei 2020            |  |  |  |  |  |  |
| Nassif 2011             |  |  |  |  |  |  |
| Natour 2015             |  |  |  |  |  |  |
| Nicholas 1991           |  |  |  |  |  |  |
| Okafor 2012             |  |  |  |  |  |  |
| O'Keeffe 2020           |  |  |  |  |  |  |
| Patti 2016              |  |  |  |  |  |  |
| Paungmali 2017          |  |  |  |  |  |  |
| Petrozzi 2019           |  |  |  |  |  |  |
| Phattharasupharerk 2019 |  |  |  |  |  |  |
| Pires 2015              |  |  |  |  |  |  |
| Polaski 2021            |  |  |  |  |  |  |
| Rabiei 2021             |  |  |  |  |  |  |
| Roche-Leboucher 2011    |  |  |  |  |  |  |
| Rydeard 2006            |  |  |  |  |  |  |
| De Sousa 2009           |  |  |  |  |  |  |
| Santos 2022             |  |  |  |  |  |  |
| Saper 2009              |  |  |  |  |  |  |
| Saper 2017              |  |  |  |  |  |  |
| Schinhan 2016           |  |  |  |  |  |  |
| Shamsi 2016             |  |  |  |  |  |  |

**Figure S5.** Risk of Bias 2 visualization (part 4)

|                         |  |  |  |  |  |  |
|-------------------------|--|--|--|--|--|--|
| Shaughnessy 2004        |  |  |  |  |  |  |
| Sherman 2011            |  |  |  |  |  |  |
| Tilbrook 2011           |  |  |  |  |  |  |
| Torstensen 1998         |  |  |  |  |  |  |
| Tritilanunt 2001        |  |  |  |  |  |  |
| Turner 1990             |  |  |  |  |  |  |
| Valenza 2017            |  |  |  |  |  |  |
| VanDerRoer 2008         |  |  |  |  |  |  |
| vanErp 2021             |  |  |  |  |  |  |
| VibeFersum 2013         |  |  |  |  |  |  |
| Vollenbroek-Hutten 2004 |  |  |  |  |  |  |
| Walti 2015              |  |  |  |  |  |  |
| Waseem 2019             |  |  |  |  |  |  |
| Weifen 2013             |  |  |  |  |  |  |
| Williams 2009           |  |  |  |  |  |  |
| Williams 2018           |  |  |  |  |  |  |
| Yang 2021               |  |  |  |  |  |  |
| Zadro 2019              |  |  |  |  |  |  |
| Zhang 2014              |  |  |  |  |  |  |
| Zheng 2022              |  |  |  |  |  |  |
| Zou 2019                |  |  |  |  |  |  |

Domains:

D1: Bias arising from the randomization process.

D2: Bias due to deviations from intended intervention.

D3: Bias due to missing outcome data.

D4: Bias in measurement of the outcome.

D5: Bias in selection of the reported result.

Judgement

High

Some concerns

Low

**Table S2.** Mean difference and standard error of pain outcomes

| ID                         | MD    | SE (MD) | Treatment 1 | Treatment 2 |
|----------------------------|-------|---------|-------------|-------------|
| Ahmed 2021 <sup>1</sup>    | -1.6  | 2.57    | ET          | MBR-WR      |
| Ahmed 2021 <sup>1</sup>    | -1.8  | 2.68    | ET          | UC          |
| Ahmed 2021 <sup>1</sup>    | -0.2  | 2.52    | MBR-WR      | UC          |
| Almhdawi 2020              | -27.0 | 6.40    | ET          | MI          |
| Alvani 2021                | -14.6 | 6.06    | ET          | MI          |
| Barone Gibbs 2018          | 4.0   | 8.30    | MBR-ED      | MI          |
| Bodes Pardo 2018           | 18.0  | 4.33    | ET          | MBR-ED      |
| Borys 2015                 | -15.0 | 2.82    | MBR-ED      | MI          |
| Costa 2009                 | -10.0 | 4.35    | ET          | UC          |
| Cruz-Diaz 2018             | -28.0 | 3.22    | ET          | MI          |
| Cuesta-Vargas 2012         | -14.9 | 4.37    | ET          | UC          |
| Darnall 2021               | -10.7 | 3.60    | MBR-BE      | MI          |
| Devasahayam 2014           | 10.0  | 12.23   | MBR-BE      | UC          |
| Donzelli 2006              | 4.4   | 5.23    | ET          | MBR-ED      |
| Dufour 2010                | 6.2   | 2.52    | ET          | MBR-ED      |
| Durmus 2014                | 23.7  | 3.31    | ET          | MBR-ED      |
| Frost 1995                 | -10.0 | 3.78    | ET          | MI          |
| Garcia 2018                | -8.6  | 4.58    | MBR-ED      | MI          |
| Gardner 2019               | 23.0  | 4.16    | ET          | MBR-BE      |
| Godfrey 2020               | -5.0  | 3.39    | MBR-BE      | UC          |
| Goldby 2006                | -5.6  | 6.78    | MBR-ED      | MI          |
| Hall 2011                  | -13.0 | 3.38    | ET          | MI          |
| Haufe 2017                 | -16.0 | 6.20    | ET          | MI          |
| Highland 2018              | -11.9 | 4.94    | ET          | MI          |
| Jaromi 2012                | -1.3  | 0.80    | MBR-ED      | UC          |
| Jaromi 2018                | -41.8 | 1.37    | MBR-ED      | MI          |
| Jensen 2012                | -5.0  | 4.30    | ET          | MI          |
| Kääpä 2006                 | 1.0   | 4.48    | ET          | MBR-BE      |
| Kader 2012                 | 13.8  | 5.35    | ET          | MBR-ED      |
| Kankaanpää 1999            | -8.3  | 7.01    | ET          | MI          |
| Khan 2014                  | -25.9 | 3.65    | MBR-ED      | UC          |
| Khodadad 2020 <sup>2</sup> | 1.0   | 3.86    | ET          | MBR-BE      |
| Khodadad 2020 <sup>2</sup> | -25.0 | 5.36    | MBR-BE      | UC          |
| Khodadad 2020 <sup>2</sup> | -24.0 | 5.00    | ET          | UC          |
| Kim 2020                   | 3.7   | 4.64    | ET          | MBR-ED      |
| Kim 2022                   | 5.9   | 4.46    | ET          | MBR-ED      |
| Kofotolis 2006             | -2.0  | 1.12    | ET          | UC          |
| Koldas Dogan 2008          | -3.2  | 8.13    | ET          | UC          |
| Kumar 2009 A               | -12.2 | 1.54    | ET          | UC          |
| Kumar 2009 B               | -8.7  | 3.32    | ET          | UC          |
| Kuvacic 2018               | -12.0 | 2.15    | ET          | MI          |
| Linden 2014                | -10.4 | 3.81    | MBR-BE      | UC          |
| Masharawi 2013             | -22.0 | 3.90    | ET          | MI          |
| Mazloun 2018               | -22.5 | 4.06    | ET          | MI          |
| McCaskey 2018              | 0.0   | 7.08    | ET          | UC          |
| Michalsen 2021             | -3.3  | 2.21    | ET          | UC          |

| ID                       | MD    | SE (MD) | Treatment 1 | Treatment 2 |
|--------------------------|-------|---------|-------------|-------------|
| Miyamoto 2013            | -21.0 | 4.96    | ET          | UC          |
| Monticone 2013           | 22.7  | 2.38    | ET          | MBR-BE      |
| Monticone 2014           | 0.0   | 7.07    | MBR-BE      | UC          |
| Monticone 2016           | -31.0 | 2.51    | MBR-BE      | UC          |
| Morone 2011              | -18.0 | 4.66    | MBR-ED      | MI          |
| Morone 2012              | -20.0 | 6.11    | MBR-WR      | MI          |
| Moseley 2002             | -12.3 | 5.35    | MBR-ED      | MI          |
| Nambi 2021               | -11.0 | 1.44    | ET          | UC          |
| Narouei 2020             | -11.0 | 5.35    | ET          | UC          |
| Nassif 2011              | -16.5 | 6.32    | MBR-ED      | MI          |
| Natour 2015              | -4.6  | 7.04    | ET          | UC          |
| Nicholas 1991            | -12.9 | 4.34    | MBR-BE      | UC          |
| Okafor 2012              | -15.7 | 4.40    | ET          | UC          |
| O'Keeffe 2020            | -16.9 | 4.28    | MBR-BE      | UC          |
| Paungmali 2017           | -5.5  | 5.94    | ET          | MI          |
| Petrozzi 2019            | -1.0  | 3.89    | MBR-BE      | UC          |
| Phattharasupharerk 2019  | -39.5 | 4.88    | ET          | MI          |
| Pires 2015               | 6.1   | 4.84    | ET          | MBR-ED      |
| Polaski 2021             | -8.5  | 5.33    | MBR-WR      | MI          |
| Rabiei 2021              | 11.2  | 3.25    | ET          | MBR-ED      |
| Roche-Leboucher 2011     | 5.0   | 3.99    | ET          | MBR-WR      |
| Rydeard 2006             | -15.6 | 4.74    | ET          | UC          |
| De Sousa 2009            | -14.1 | 7.36    | MBR-BE      | MI          |
| Santos 2022              | -14.6 | 5.07    | ET          | MI          |
| Saper 2009               | -27.0 | 5.94    | ET          | MI          |
| Saper 2017               | -4.9  | 3.06    | ET          | MI          |
| Schinhan 2016            | -16.4 | 5.68    | ET          | UC          |
| Shamsi 2016              | 0.0   | 3.92    | ET          | UC          |
| Sherman 2011             | -1.0  | 3.76    | ET          | MI          |
| Torstensen 1998          | -1.8  | 4.55    | ET          | UC          |
| Tritilanunt 2001         | 16.7  | 4.51    | ET          | MBR-ED      |
| Turner 1990 <sup>3</sup> | 1.6   | 4.56    | ET          | MBR-BE      |
| Turner 1990 <sup>3</sup> | -6.0  | 4.73    | MBR-BE      | MI          |
| Turner 1990 <sup>3</sup> | -4.4  | 4.23    | ET          | MI          |
| Valenza 2017             | -14.0 | 5.17    | ET          | UC          |
| Van Der Roer 2008        | -1.0  | 4.53    | MBR-BE      | UC          |
| Van Erp 2021             | -2.0  | 10.66   | MBR-BE      | UC          |
| VibeFersum 2013          | -21.0 | 3.75    | MBR-BE      | UC          |
| Walti 2015               | -12.3 | 6.63    | MBR-ED      | UC          |
| Weifen 2013              | -9.0  | 0.71    | ET          | MI          |
| Williams 2009            | -8.5  | 4.64    | ET          | MI          |
| Williams 2018            | 0.0   | 3.60    | MBR-ED      | MI          |
| Yang 2021                | -1.1  | 6.99    | ET          | UC          |
| Zadro 2019               | -6.0  | 6.07    | ET          | UC          |
| Zhang 2014               | -6.9  | 4.99    | MBR-ED      | UC          |
| Zheng 2022               | -1.0  | 4.30    | ET          | MBR-ED      |
| Zou 2019                 | -19.8 | 3.38    | ET          | MI          |

**Table S3.** Standardized Mean difference and standard error of disability outcomes

| ID                      | SMD    | SE (SMD) | Treatment 1 | Treatment 2 |
|-------------------------|--------|----------|-------------|-------------|
| Ahmed 2021 <sup>1</sup> | 0.054  | 0.224    | ET          | MBR-WR      |
| Ahmed 2021 <sup>1</sup> | 0.167  | 0.219    | ET          | UC          |
| Ahmed 2021 <sup>1</sup> | 0.113  | 0.216    | MBR-WR      | UC          |
| Almhdawi 2020           | -0.836 | 0.327    | ET          | MI          |
| Alvani 2021             | -0.684 | 0.377    | ET          | MI          |
| Barone Gibbs 2018       | -0.347 | 0.389    | MBR-ED      | MI          |
| Bodes Pardo 2018        | 1.282  | 0.295    | ET          | MBR-ED      |
| Costa 2009              | -0.369 | 0.163    | ET          | UC          |
| Costantino 2014         | -0.453 | 0.276    | ET          | MBR-ED      |
| Cruz-Diaz 2018          | -2.159 | 0.323    | ET          | MI          |
| Cuesta-Vargas 2012      | -0.783 | 0.297    | ET          | UC          |
| Devasahayam 2014        | -2.035 | 0.679    | MBR-BE      | UC          |
| Donzelli 2006           | 0.163  | 0.306    | ET          | MBR-ED      |
| Dufour 2010             | 0.255  | 0.128    | ET          | MBR-ED      |
| Durmus 2014             | 0.917  | 0.191    | ET          | MBR-ED      |
| Frost 1995              | -0.330 | 0.239    | ET          | MI          |
| Garcia 2018             | -0.295 | 0.166    | MBR-ED      | MI          |
| Gardner 2019            | 0.700  | 0.238    | ET          | MBR-BE      |
| Godfrey 2020            | -0.218 | 0.143    | MBR-BE      | UC          |
| Goldby 2006             | 0.168  | 0.200    | MBR-ED      | MI          |
| Gupta 2019              | -7.023 | 1.036    | MBR-WR      | UC          |
| Hall 2011               | -0.209 | 0.159    | ET          | MI          |
| Haufe 2017              | -0.429 | 0.273    | ET          | MI          |
| Highland 2018           | -0.489 | 0.246    | ET          | MI          |
| Jensen 2012             | 0.019  | 0.215    | ET          | MI          |
| Kääpä 2006              | 0.065  | 0.183    | ET          | MBR-BE      |
| Kader 2012              | 0.048  | 0.309    | ET          | MBR-ED      |
| Kankaanpää 1999         | -0.009 | 0.274    | ET          | MI          |
| Khan 2014               | -1.956 | 0.335    | MBR-ED      | UC          |
| Kim 2020                | 0.347  | 0.362    | ET          | MBR-ED      |
| Kim 2022                | 0.582  | 0.341    | ET          | MBR-ED      |
| Kofotolis 2006          | -0.914 | 0.277    | ET          | UC          |
| Koldas Dogan 2008       | -0.729 | 0.345    | ET          | UC          |
| Kuvacic 2018            | -0.995 | 0.390    | ET          | MI          |
| Masharawi 2013          | -0.857 | 0.332    | ET          | MI          |
| Mazloum 2018            | -0.663 | 0.339    | ET          | MI          |
| McCaskey 2018           | -0.407 | 0.432    | ET          | UC          |
| Michalsen 2021          | 0.110  | 0.171    | ET          | UC          |
| Miyamoto 2013           | -0.739 | 0.223    | ET          | MI          |
| Monticone 2013          | 2.756  | 0.297    | ET          | MBR-BE      |
| Monticone 2014          | -1.858 | 0.553    | MBR-BE      | UC          |
| Monticone 2016          | -1.889 | 0.198    | MBR-BE      | UC          |
| Morone 2011             | -0.014 | 0.243    | MBR-ED      | UC          |
| Morone 2012             | -0.376 | 0.286    | MBR-WR      | MI          |
| Moseley 2002            | -0.633 | 0.293    | MBR-ED      | MI          |
| Narouei 2020            | -0.826 | 0.371    | ET          | UC          |



| ID                      | SMD    | SE (SMD) | Treatment 1 | Treatment 2 |
|-------------------------|--------|----------|-------------|-------------|
| Nassif 2011             | -0.201 | 0.259    | MBR-ED      | MI          |
| Natour 2015             | -0.373 | 0.261    | ET          | UC          |
| O'Keeffe 2020           | -0.825 | 0.183    | MBR-BE      | UC          |
| Patti 2016              | -0.296 | 0.326    | ET          | MI          |
| Petrozzi 2019           | -0.088 | 0.194    | MBR-BE      | UC          |
| Phattharasupharerk 2019 | -0.581 | 0.241    | ET          | MI          |
| Pires 2015              | 0.460  | 0.271    | ET          | MBR-ED      |
| Polaski 2021            | -0.746 | 0.337    | MBR-WR      | MI          |
| Rabiei 2021             | 0.560  | 0.239    | ET          | MBR-ED      |
| Rydeard 2006            | -0.768 | 0.334    | ET          | UC          |
| De Sousa 2009           | -0.509 | 0.282    | MBR-BE      | UC          |
| Santos 2022             | -3.678 | 0.649    | ET          | MI          |
| Saper 2009              | -0.924 | 0.387    | ET          | MI          |
| Saper 2017              | -0.215 | 0.157    | ET          | MI          |
| Shamsi 2016             | -0.440 | 0.309    | ET          | UC          |
| Shaughnessy 2004        | -1.363 | 0.350    | ET          | MI          |
| Sherman 2011            | -0.252 | 0.188    | ET          | MI          |
| Tilbrook 2011           | -0.399 | 0.121    | ET          | UC          |
| Torstensen 1998         | -0.053 | 0.170    | ET          | UC          |
| Valenza 2017            | -0.826 | 0.284    | ET          | MI          |
| Van Der Roer 2008       | 0.000  | 0.208    | MBR-BE      | UC          |
| VanErp 2021             | -0.346 | 0.404    | MBR-BE      | UC          |
| VibeFersum 2013         | -1.466 | 0.234    | MBR-BE      | UC          |
| Vollenbroek-Hutten 2004 | -0.398 | 0.165    | MBR-ED      | MI          |
| Walti 2015              | -0.695 | 0.398    | MBR-ED      | UC          |
| Waseem 2019             | -1.277 | 0.212    | ET          | UC          |
| Williams 2009           | -0.284 | 0.228    | ET          | MI          |
| Williams 2018           | -0.298 | 0.180    | MBR-ED      | MI          |
| Yang 2021               | 0.063  | 0.320    | ET          | UC          |
| Zadro 2019              | -0.333 | 0.260    | ET          | UC          |
| Zhang 2014              | -0.420 | 0.289    | MBR-ED      | UC          |
| Zheng 2022              | -0.259 | 0.318    | ET          | MBR-ED      |

**Legend (S2 & S3):** MD = mean difference; SMD = standardized mean difference; SE (MD) = standard error of mean difference; SE (SMD) = standard error of standardized mean difference; <sup>1</sup> = three-arm study Ahmed, 2021; <sup>2</sup> = three-arm study Khodadad 2020; <sup>3</sup> = three-arm study Turner 1990

**Note 1:** Difference is calculated as Treatment 1 – Treatment 2

**Note 2:** Mean difference is on a scale of 0 – 100 (VAS pain)

## Frequentist Network meta-analysis of pain outcomes

**Table S4.** Between, within and total homogeneity / consistency

|                 | Q      | Df | p-value |
|-----------------|--------|----|---------|
| Total           | 920.85 | 85 | <0.001  |
| Within designs  | 628.07 | 74 | <0.001  |
| Between designs | 292.78 | 11 | <0.001  |

**Table S5.** Q statistic under the assumption of a full design-by-treatment interaction random effects model

|                 | Q     | Df | p-value | $\tau$ | $\tau^2$ |
|-----------------|-------|----|---------|--------|----------|
| Between designs | 14.39 | 11 | 0.212   | 9.359  | 87.590   |

**Figure S6.** Local inconsistency assessment using inconsistency factors and 95% CI

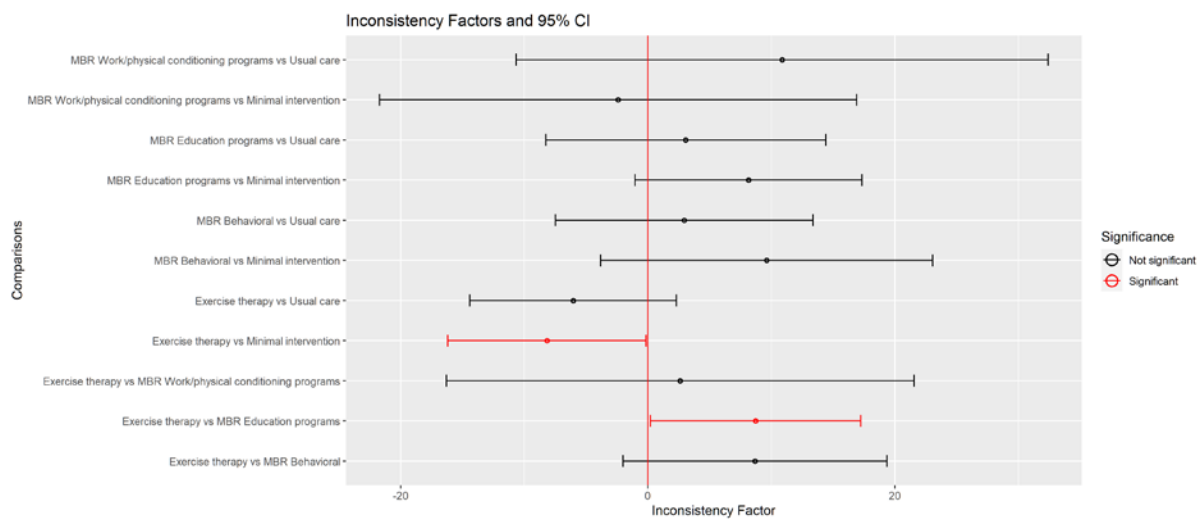

## Frequentist Network meta-analysis of short-term disability outcomes

**Table S6.** Between, within and total homogeneity / consistency

|                 | Q      | Df | p-value |
|-----------------|--------|----|---------|
| Total           | 316.89 | 70 | <0.001  |
| Within designs  | 282.52 | 65 | <0.001  |
| Between designs | 34.37  | 5  | <0.001  |

**Table S7.** Q statistic under the assumption of a full design-by-treatment interaction random effects model

|                 | Q    | Df | p-value | $\tau$ | $\tau^2$ |
|-----------------|------|----|---------|--------|----------|
| Between designs | 9.53 | 5  | 0.090   | 0.443  | 0.196    |

**Figure S7.** Local inconsistency assessment using inconsistency factors and 95% CI

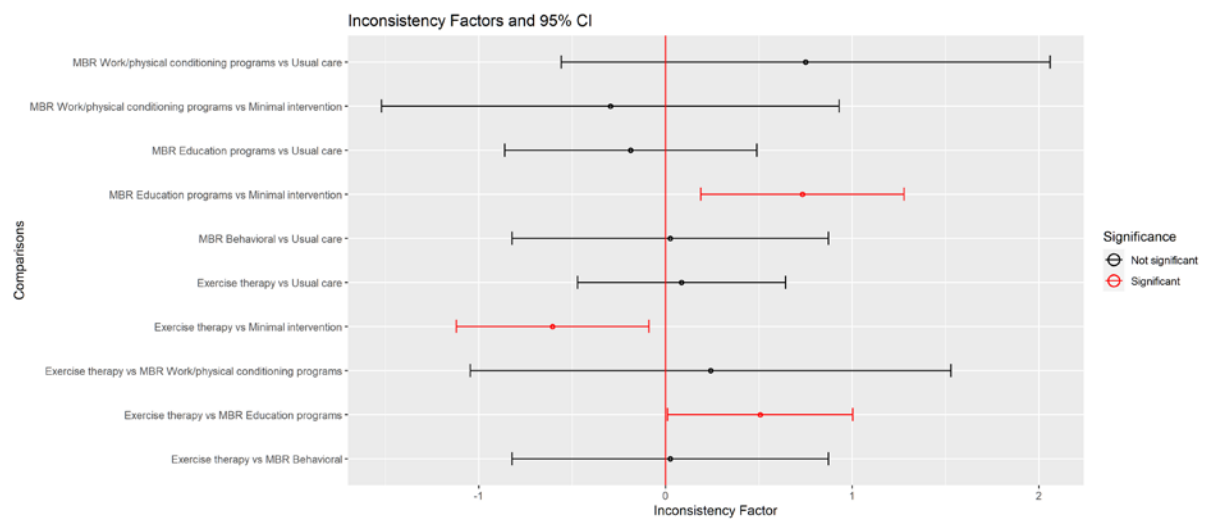

**Figure S8.** Funnel plot for NMA of pain outcomes

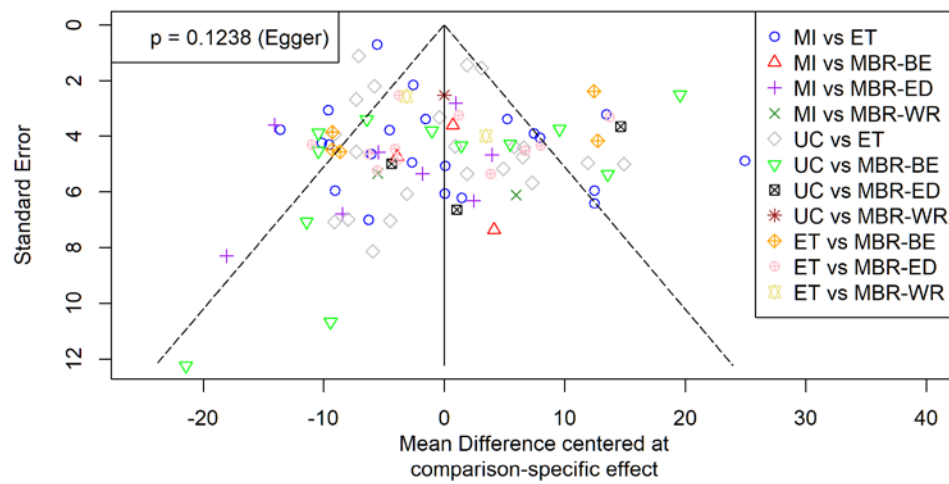

**Figure S9.** Funnel plot for NMA of disability outcomes

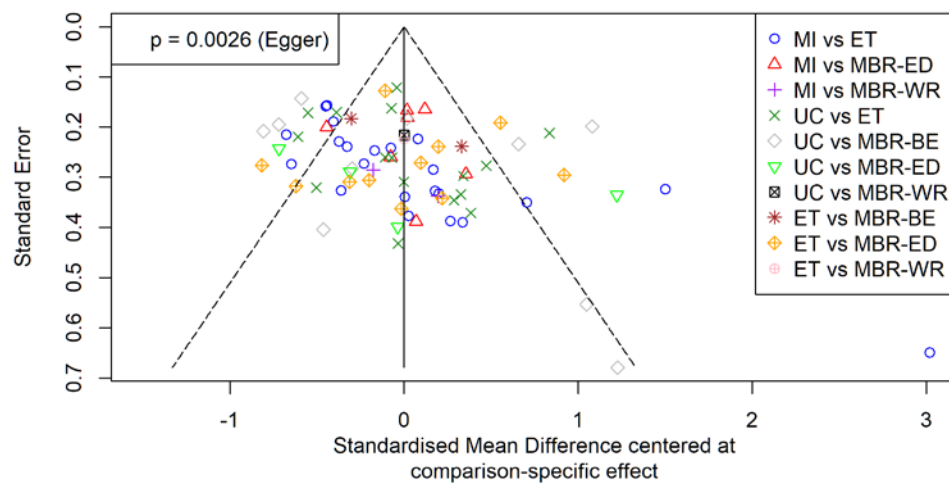

## Bayesian Network Meta-Analysis of PAIN outcome

**Figure S10.** Node-splitting analysis of inconsistency for pain outcome

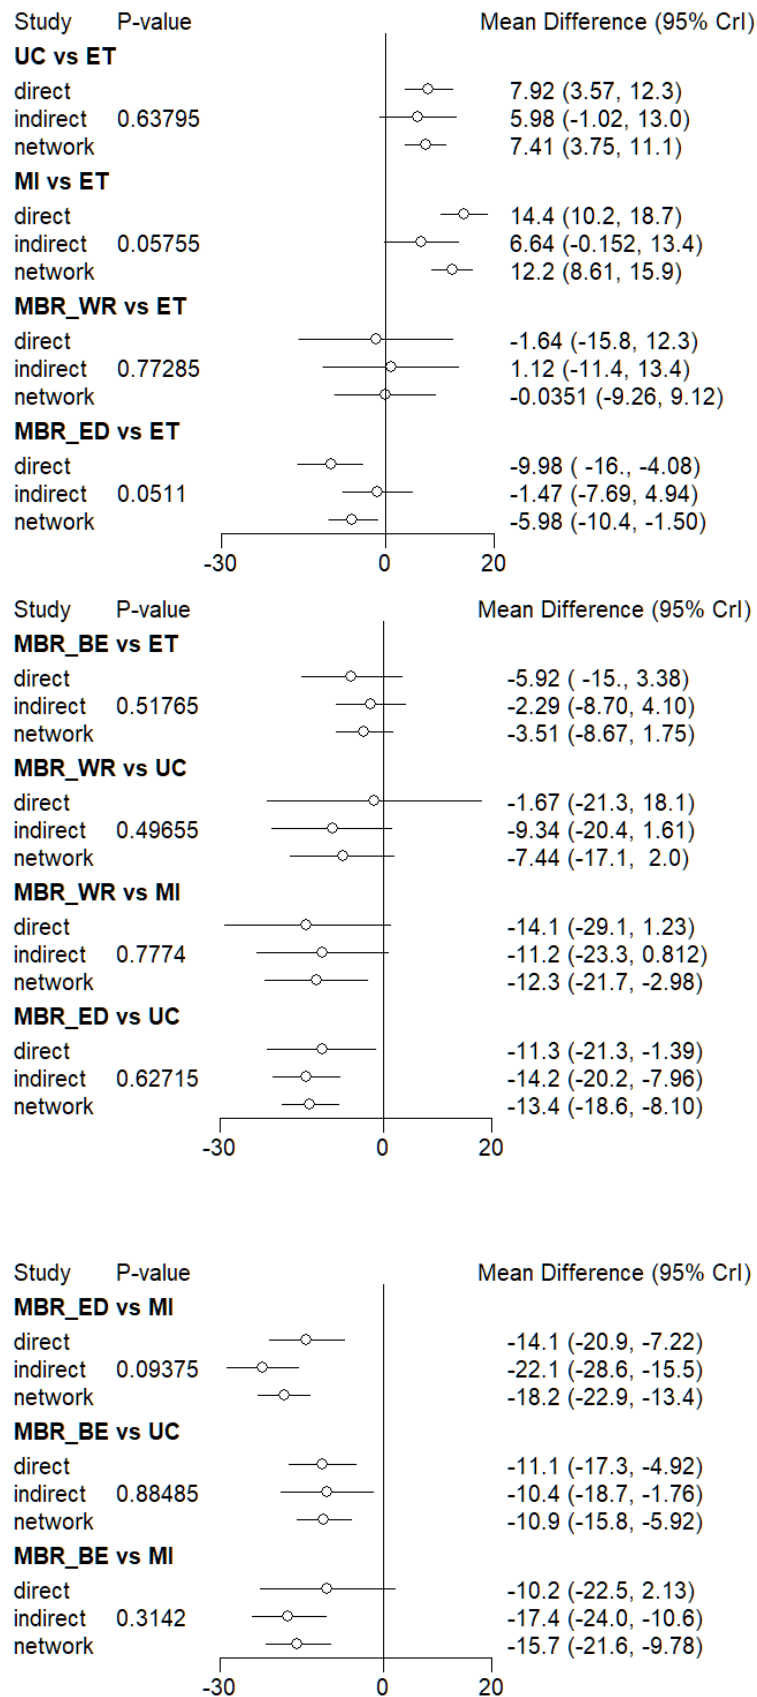

Figure S11. Probability rankings (pain outcome)

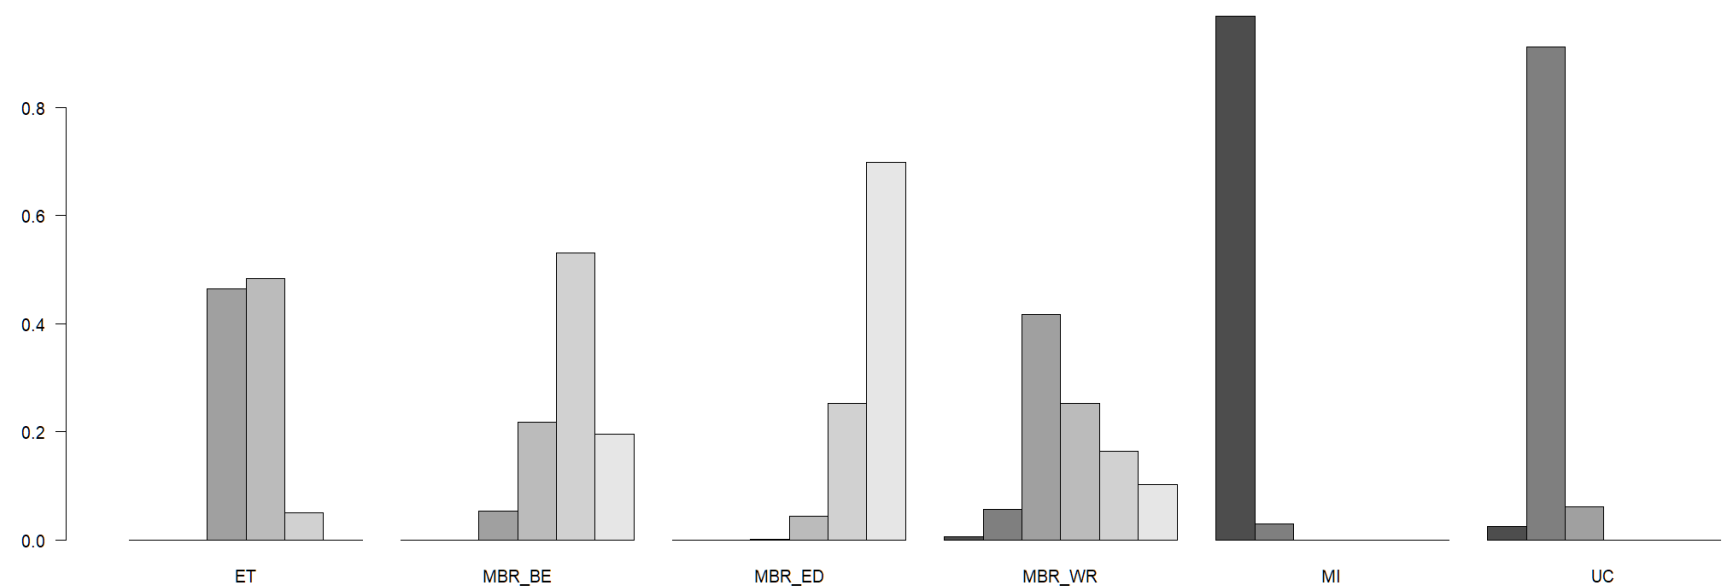

Figure S12. Forest plot of all treatment groups vs Minimal intervention (pain outcome)

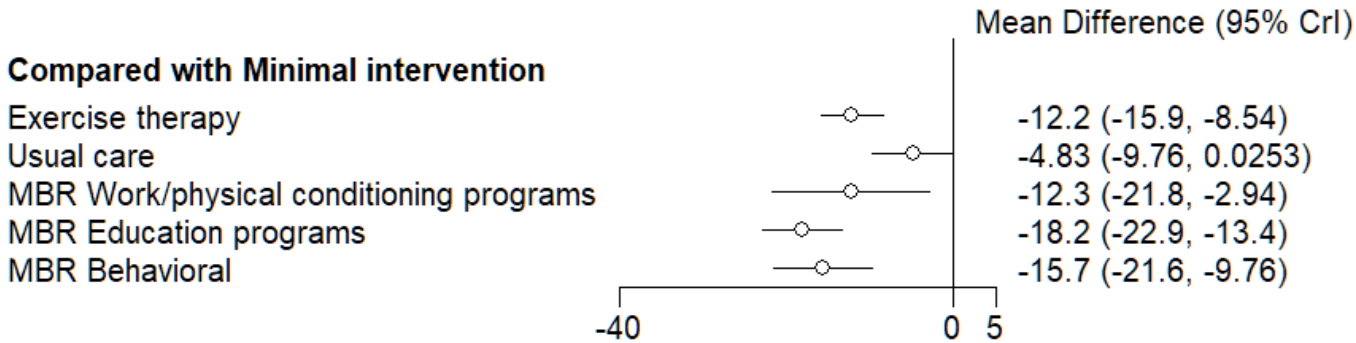

## Bayesian Network Meta-Analysis of DISABILITY outcome

Figure S13. Node-splitting analysis of inconsistency for disability outcome

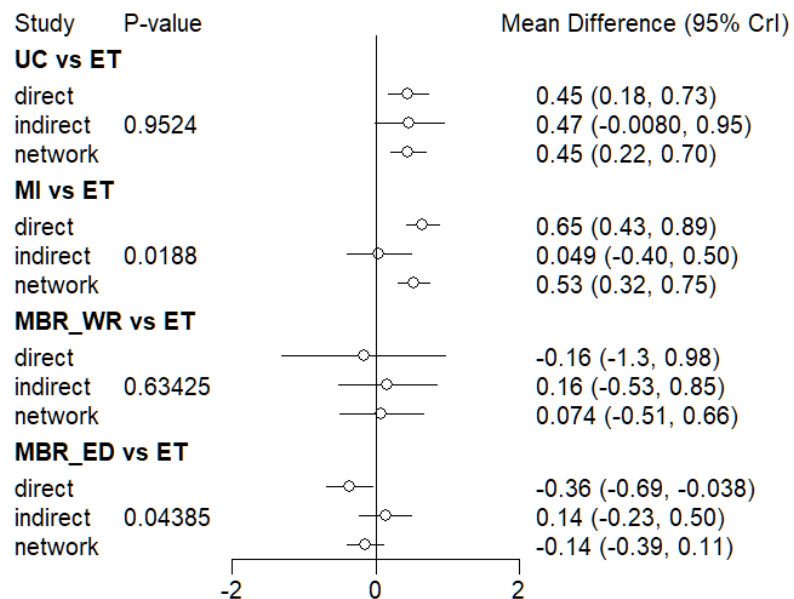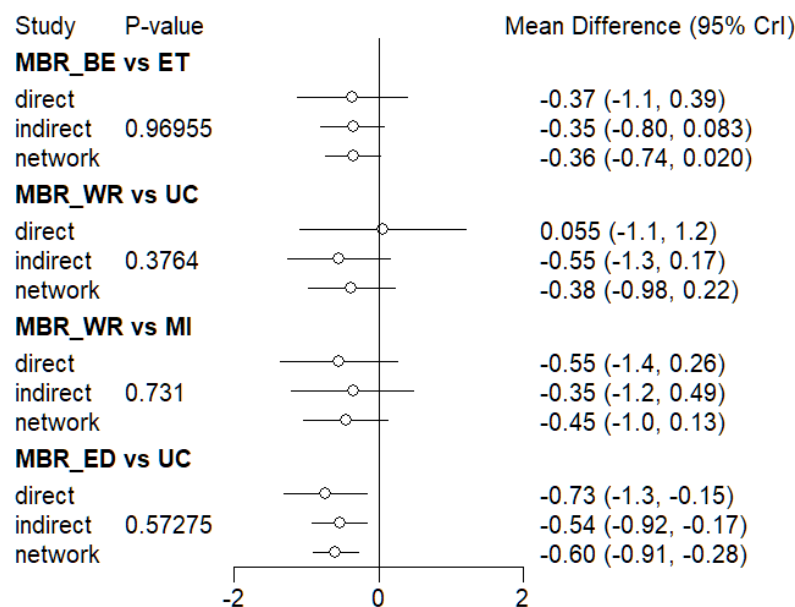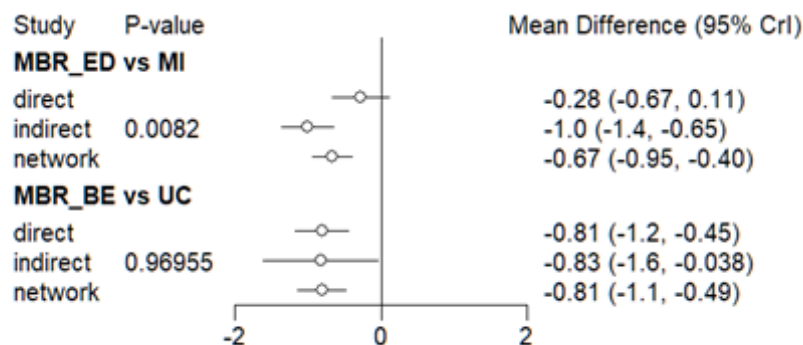

**Figure S14.** Probability rankings (disability outcome)

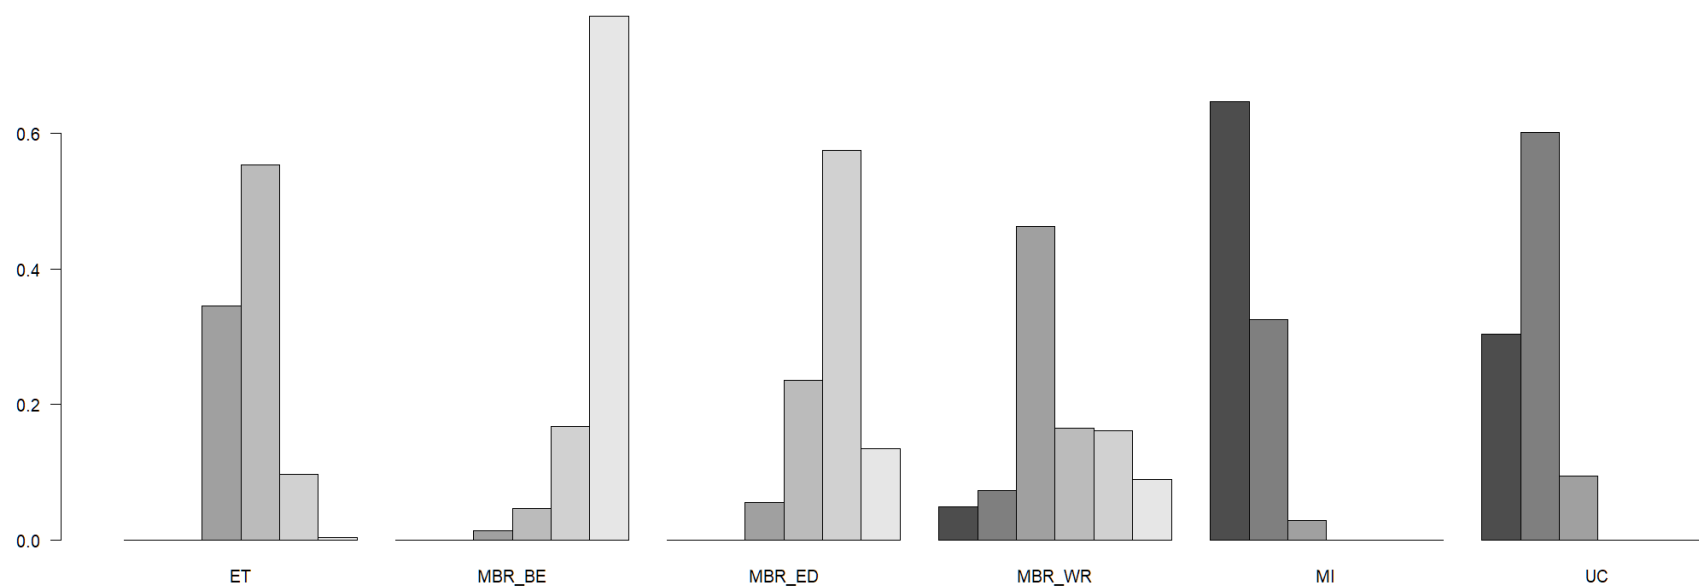

**Figure S15.** Forest plot of all treatment groups vs Minimal intervention (disability outcome)

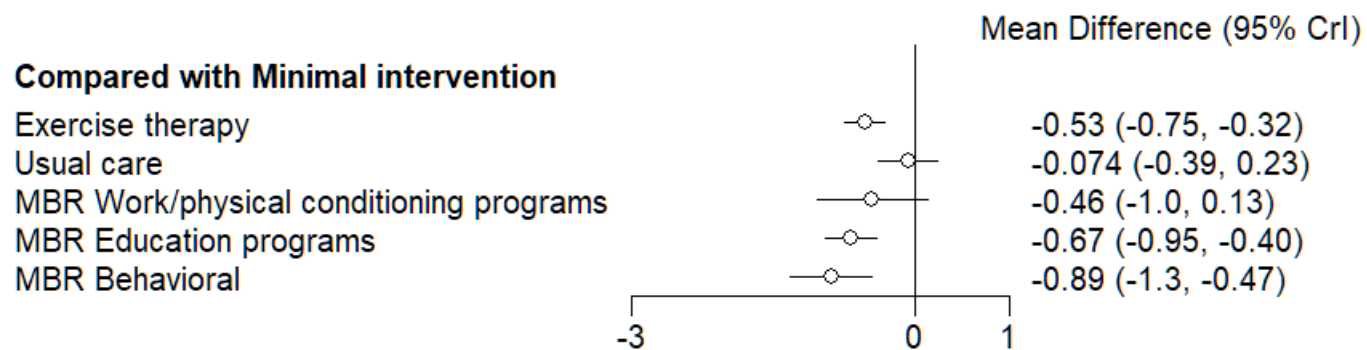

Supplement: s1 [file s1]
